# Supplementary material for: Reliability of foveal avascular zone measurements in eyes with retinal vein occlusion using optical coherence tomography angiography
Source: Int J Retina Vitreous. 2020 Aug 3;6:35. doi: 10.1186/s40942-020-00237-w (PMC7398327; doi:10.1186/s40942-020-00237-w)
Supplement: Supplementary file 1 — Additional file 1. Ethics Committee Approval provided by UNIFESP Institutional Review Board. [file 40942_2020_237_MOESM1_ESM.pdf]

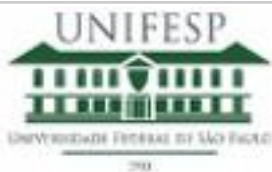

UNIFESP - HOSPITAL SÃO  
PAULO - HOSPITAL  
UNIVERSITÁRIO DA

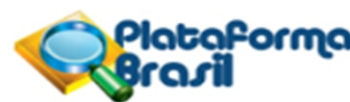

## PARECER CONSUBSTANCIADO DO CEP

### DADOS DO PROJETO DE PESQUISA

**Título da Pesquisa:** Confiabilidade da medida da zona avascular foveal em olhos com oclusão venosa de retina usando angiografia por tomografia de coerência óptica

**Pesquisador:** Bruno Mauricio Rodrigues de Oliveira

**Área Temática:**

**Versão:** 2

**CAAE:** 12801919.3.0000.5505

**Instituição Proponente:** Universidade Federal de São Paulo

**Patrocinador Principal:** Financiamento Próprio

### DADOS DO PARECER

**Número do Parecer:** 3.445.580

#### Apresentação do Projeto:

Projeto CEP/UNIFESP n: 0492/2019 (parecer final) PROJETO APROVADO

Trata-se de projeto de Especializacao de Bruno Mauricio Rodrigues de Oliveira.

Equipe: Bruno Rebello de Godoy; Alexandre Gomes Bortolotti de Azevedo.

Orientadores: Prof(a). Dr(a). Somaia Mitne; Flavio Hirai; Nilva Simeren Bueno de Moraes.

Projeto vinculado ao Departamento de Departamento de Oftalmologia e Ciencias Visuais, Campus Sao Paulo, Escola Paulista de Medicina, UNIFESP.

-As informacoes elencadas nos campos "Apresentacao do Projeto", "Objetivo da Pesquisa" e "Avaliacao dos Riscos e Beneficios" foram retiradas do arquivo Informacoes Basicas da Pesquisa (PB\_INFORMACOES\_BASICAS\_DO\_PROJETO\_1329621.pdf, postado em 29/04/2019).  
APRESENTACAO: A oclusao venosa de retina e uma doenca comum capaz de causar importante morbidade. Tradicionalmente, o exame de escolha para avaliar perfusao vascular retiniana e a angiofluoresceinografia. Mais recentemente, o avanco da tecnologia da tomografia de coerencia optica permite que mapas angiograficos da retina sejam obtidos de maneira nao invasiva. Sua alta resolucao de imagem permite avaliar ate mesmo os capilares da retina, sendo possivel medir as dimensoes da zona avascular foveal. Contudo, nao se sabe qual a confiabilidade e variabilidade dessas medidas.

O objetivo do presente estudo e avaliar a confiabilidade das medidas da zona avascular foveal em

**Endereço:** Rua Francisco de Castro, 55

**Bairro:** VILA CLEMENTINO

**CEP:** 04.020-050

**UF:** SP

**Município:** SAO PAULO

**Telefone:** (11)5571-1062

**Fax:** (11)5539-7162

**E-mail:** cep@unifesp.edu.br



Continuação do Parecer: 3.445.580

pacientes com oclusão venosa retiniana a partir do uso de tomografia de coerência óptica.

**HIPOTESE:** A mensuração da zona avascular foveal a partir dos mapas angiográficos do exame de tomografia de coerência óptica podem ser confiáveis e reprodutíveis entre diferentes observadores.

**Objetivo da Pesquisa:**

Objetivo Primário: O objetivo deste estudo é o de avaliar a confiabilidade das medições da área da ZAF usando Topcon DRI OCT Triton Swept Source entre diferentes examinadores.

**Avaliação dos Riscos e Benefícios:**

Em relação aos riscos e benefícios, o pesquisador(a) declara:

Riscos: Risco de exposição de dados de exames pessoais.

Benefícios: Não há benefícios diretos envolvidos na participação do presente estudo, contudo há benefícios indiretos de contribuição para melhor entendimento das alterações vasculares apresentadas em oclusões venosas retinianas em exame de tomografia de coerência óptica.

**Comentários e Considerações sobre a Pesquisa:**

TIPO DE ESTUDO: observacional retrospectivo.

LOCAL: ambulatório de Retina e Vítreo do Departamento de Oftalmologia e Ciências Visuais da Universidade Federal de São Paulo.

PARTICIPANTES: 30 pacientes com diagnóstico de oclusão venosa retiniana.

Critério de Inclusão: Exames de pacientes com diagnóstico de oclusão venosa retiniana nos últimos dois anos.

Critério de Exclusão: Presença de outra doença vascular retiniana concomitante.

**PROCEDIMENTOS:** Trata-se de revisão de exames de tomografia por coerência óptica de pacientes com oclusão venosa retiniana diagnosticada nos últimos dois anos no ambulatório de Retina e Vítreo do Departamento de Oftalmologia e Ciências Visuais da Universidade Federal de São Paulo. Serão analisados mapas angiográficos obtidos a partir de exame de tomografia de coerência óptica (Topcon DRI Triton Optical Coherence Tomography Swept Source) e realizadas medidas do tamanho da zona avascular foveal apresentada em cada caso. As medidas serão feitas a partir de software incluso no próprio equipamento, no qual as imagens estão registradas. Três examinadores realizarão as medidas de forma independente em dois momentos distintos. Analise

**Endereço:** Rua Francisco de Castro, 55

**Bairro:** VILA CLEMENTINO

**CEP:** 04.020-050

**UF:** SP

**Município:** SÃO PAULO

**Telefone:** (11)5571-1062

**Fax:** (11)5539-7162

**E-mail:** cep@unifesp.edu.br

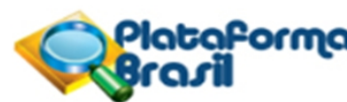

Continuação do Parecer: 3.445.580

estatística será feita para determinar o coeficiente de correlação intra-classe a fim de determinar o índice de confiabilidade inter-observador e intra-observador das medidas realizadas. (mais informações, ver projeto detalhado).

**Considerações sobre os Termos de apresentação obrigatória:**

1-Foram apresentados adequadamente os principais documentos: folha de rosto; projeto completo; cópia do cadastro CEP/UNIFESP, orçamento financeiro.

2-Outros documentos importantes anexados na Plataforma Brasil:

a)Carta da COEP (Outros:<cep1.pdf> POSTAGEM: 29/04/2019).

b)Termo de anonimização (Outros: <TERMODEANONIMIZACAO\_SIGILO1.docx> Postagem: 29/04/2019)

3- O(A) Pesquisador(a) solicitou a dispensa do TCLE, com a justificativa: "O presente estudo fará uso apenas do banco de dados de exames de tomografia de coerência óptica realizado pelos pacientes com oclusão venosa de retina que fazem acompanhamento nos ambulatórios de Retina e Vítreo, vinculados ao Hospital São Paulo e Universidade Federal de São Paulo. Não é possível obter contato com os pacientes para assinatura de TCLE, pois muitos não realizam mais seguimento ambulatorial na instituição. Apresento, dessa forma, termo de anonimização e sigilo de dados."

**Conclusões ou Pendências e Lista de Inadequações:**

Respostas ao parecer nº 3377370 de 07 de Junho de 2019. PROJETO APROVADO.

PENDÊNCIA 1. No formulário de informações básicas no campo "Benefícios" consta "Não há benefícios envolvidos na participação do presente estudo, pois não há intervenção clínica direta." Não existe pesquisa que não traga benefício, mesmo que seja de forma indireta. Portanto, é necessário informar os benefícios da pesquisa, mesmo que sejam indiretos (exemplo: "Mesmo não tendo benefícios diretos para o participante, indiretamente esta pesquisa contribuirá para a compreensão dos fatores que...."). Por favor, alterar o formulário de informações básicas e incluir a informação sobre os benefícios no projeto (Norma Operacional CNS nº 001 de 2013, item 3.4, 12).

RESPOSTA 1: Corrigida informação quanto ao campo de benefícios. Incluído: "Não há benefícios diretos envolvidos na participação do presente estudo, contudo há benefícios indiretos de contribuição para melhor entendimento das alterações vasculares apresentadas em oclusões venosas retinianas em exame de tomografia de coerência óptica."

**Endereço:** Rua Francisco de Castro, 55

**Bairro:** VILA CLEMENTINO

**CEP:** 04.020-050

**UF:** SP

**Município:** SÃO PAULO

**Telefone:** (11)5571-1062

**Fax:** (11)5539-7162

**E-mail:** cep@unifesp.edu.br

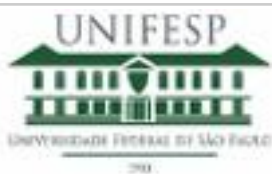

Continuação do Parecer: 3.445.580

>>> PARECER DO CEP: PENDÊNCIA RESOLVIDA <<<

PENDÊNCIA 2. No projeto consta "Pesquisadores: Bruno Mauricio Rodrigues de Oliveira; Bruno Rebello de Godoy; Alexandre Gomes Bortolotti de Azevedo; Orientadores: Somaia Mitne; Flavio Hirai; Nilva Simeren Bueno de Moraes". Todavia, no formulário de informações básicas somente consta o nome de Bruno Mauricio Rodrigues de Oliveira. Por favor, incluir o nome de todos no formulário de informações básicas como equipe de pesquisa.

RESPOSTA 2: Corrigida informação quanto aos pesquisadores envolvidos tanto no formulário básico quanto no anexo de projeto detalhado. Equipe de pesquisa: Bruno Mauricio Rodrigues de Oliveira, Bruno Rebello de Godoy, Flavio Hirai e Nilva Simeren Bueno de Moraes.

>>> PARECER DO CEP: PENDÊNCIA RESOLVIDA <<<

PENDÊNCIA 3. O cronograma informado no formulário de informações básicas indica que parte do estudo já será iniciada antes da aprovação do protocolo (Análise dos Exames De OCT - início 22/04/2019). Favor corrigir o formulário. Lembramos que nenhum estudo pode ser iniciado antes da aprovação pelo CEP/UNIFESP (Norma Operacional CNS nº 001 de 2013, item 3.3.f).

RESPOSTA 3: Corrigida informação quanto ao cronograma previsto do estudo tanto no formulário básico quanto no anexo do projeto detalhado. Adicionado que desenho de estudo e análise do banco de dados do OCT: Agosto/2019. Estatística e redação do artigo: Setembro/2019.

>>> PARECER DO CEP: PENDÊNCIA RESOLVIDA <<<

**Considerações Finais a critério do CEP:**

O CEP informa que a partir desta data de aprovação, é necessário o envio de relatórios parciais (semestralmente), e o relatório final, quando do término do estudo, por meio de notificação pela Plataforma Brasil.

**Este parecer foi elaborado baseado nos documentos abaixo relacionados:**

**Endereço:** Rua Francisco de Castro, 55

**Bairro:** VILA CLEMENTINO

**CEP:** 04.020-050

**UF:** SP

**Município:** SAO PAULO

**Telefone:** (11)5571-1062

**Fax:** (11)5539-7162

**E-mail:** cep@unifesp.edu.br

Continuação do Parecer: 3.445.580

| Tipo Documento                                            | Arquivo                                       | Postagem            | Autor                                | Situação |
|-----------------------------------------------------------|-----------------------------------------------|---------------------|--------------------------------------|----------|
| Informações Básicas do Projeto                            | PB_INFORMAÇÕES_BÁSICAS_DO_PROJETO_1320790.pdf | 16/06/2019 12:59:16 |                                      | Aceito   |
| Outros                                                    | RESPOSTASPARECERCEP.docx                      | 16/06/2019 12:58:46 | Bruno Mauricio Rodrigues de Oliveira | Aceito   |
| Projeto Detalhado / Brochura Investigador                 | projeto_detalhado.docx                        | 16/06/2019 12:54:27 | Bruno Mauricio Rodrigues de Oliveira | Aceito   |
| Outros                                                    | TERMODEANONIMIZACAO_SIGILO1.docx              | 29/04/2019 12:15:37 | Bruno Mauricio Rodrigues de Oliveira | Aceito   |
| TCLE / Termos de Assentimento / Justificativa de Ausência | dispensadetcle1.docx                          | 29/04/2019 11:57:27 | Bruno Mauricio Rodrigues de Oliveira | Aceito   |
| Outros                                                    | cep2.pdf                                      | 29/04/2019 11:48:29 | Bruno Mauricio Rodrigues de Oliveira | Aceito   |
| Outros                                                    | cep1.pdf                                      | 29/04/2019 11:48:14 | Bruno Mauricio Rodrigues de Oliveira | Aceito   |
| Folha de Rosto                                            | cep3.pdf                                      | 29/04/2019 11:47:54 | Bruno Mauricio Rodrigues de Oliveira | Aceito   |

**Situação do Parecer:**

Aprovado

**Necessita Apreciação da CONEP:**

Não

SAO PAULO, 09 de Julho de 2019

---

**Assinado por:**  
**Miguel Roberto Jorge**  
**(Coordenador(a))**

**Endereço:** Rua Francisco de Castro, 55

**Bairro:** VILA CLEMENTINO

**CEP:** 04.020-050

**UF:** SP

**Município:** SAO PAULO

**Telefone:** (11)5571-1062

**Fax:** (11)5539-7162

**E-mail:** cep@unifesp.edu.br
